# Supplementary material for: RecA maintains the integrity of chloroplast DNA molecules in Arabidopsis
Source: PubMed Central journal article supplement — J Exp Bot. 2010 Apr 20;61(10):2575–88. doi: 10.1093/jxb/erq088 (PMC2882256; doi:10.1093/jxb/erq088), 2010-04-20

# **RecA maintains the integrity of chloroplast DNA molecules in Arabidopsis**

*Beth A Rowan, Delene J Oldenburg, and Arnold J Bendich*

## **Supplementary Material**

**Figure S1. Protein alignment and phylogeny of coding regions of putative RecA homologues.** (A) Protein alignment for cpRecA and three other RecA homologues (DRT100, AT2G19490, AT3G10140) encoded in the Arabidopsis nuclear genome, *Chlamydomonas reinhardtii* (*C. reinhardtii*, nuclear-encoded, chloroplast-targeted homologue), *Synechococcus elongatus*, (*S. elongatus*, cyanobacterial homologue), and *E. coli* RecA. The last line shows the consensus sequence. (B) Neighbor-joining tree of coding sequences (excluding the region coding for the signal peptide). Values at nodes are bootstrap values from 20,000 replicates.

# Figure S1

## A

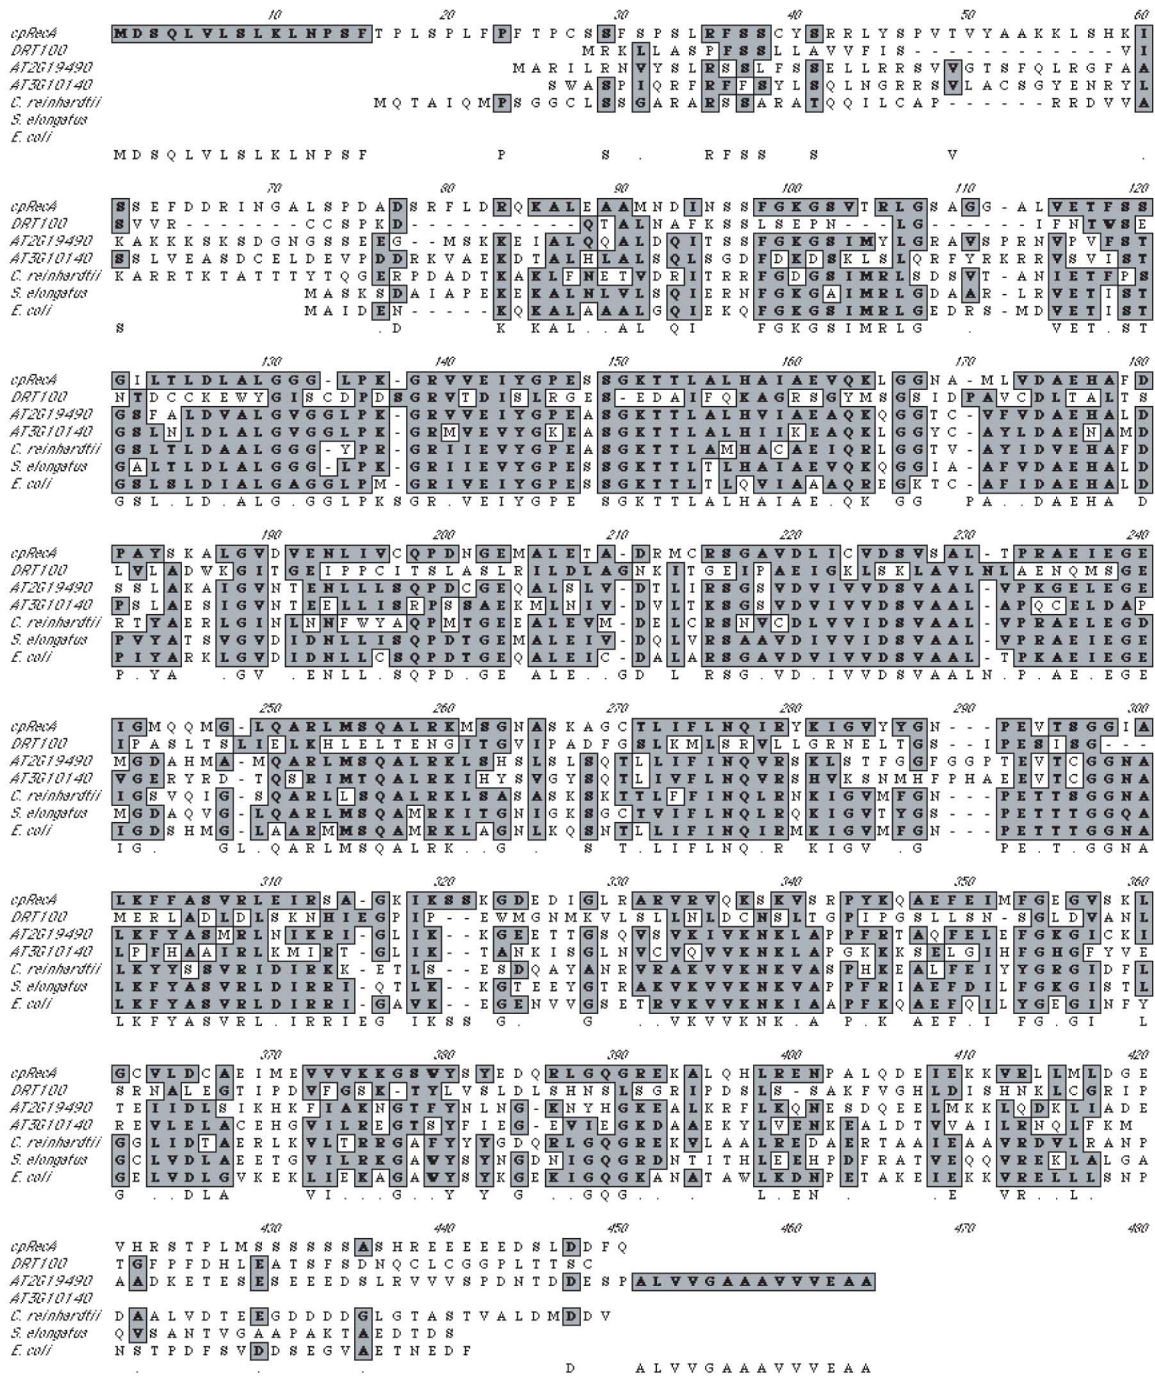

## B

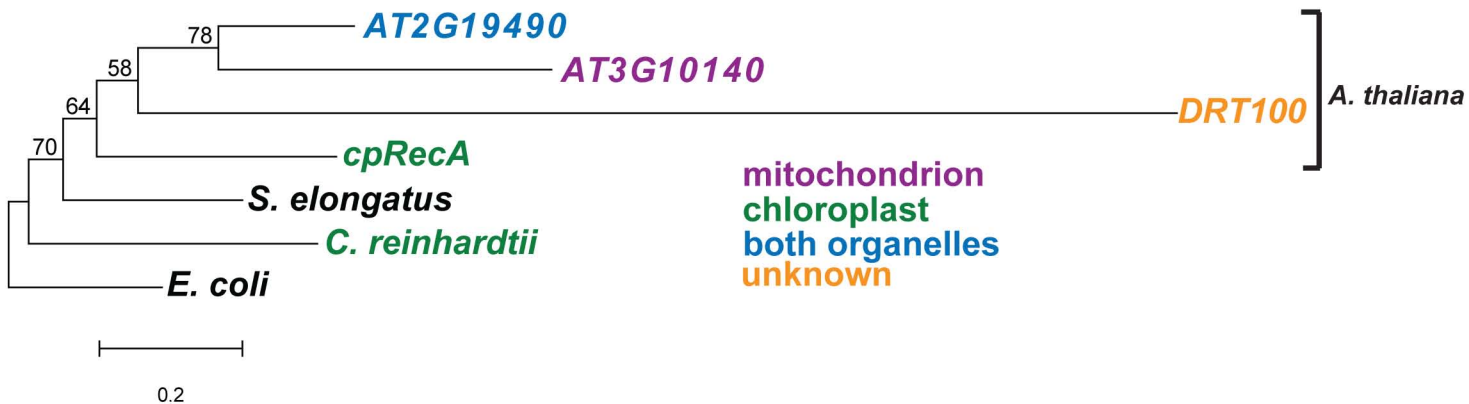

Supplement: erq088_1.pdf [file erq088_1.pdf]
